# Supplementary material
Source: MDPI journal article supplement (https://www.mdpi.com/2071-1050/13/24/14048)
Supplement: s1 [file s1]

# Participatory Mapping for Strengthening Governance on Infrastructure Impacts in the Amazon: Lessons to Improve Tools and Strategies

**Table S1.** List of stakeholder participants per mosaic, including government, indigenous or community representatives, non-profit organizations (NGO), and academia. The number of participants per institution is shown in parenthesis ( ).

|                                      | Bolivia                                     | Brazil                                                                                             | Colombia                                                                             | Peru (n = 31)                                                           |
|--------------------------------------|---------------------------------------------|----------------------------------------------------------------------------------------------------|--------------------------------------------------------------------------------------|-------------------------------------------------------------------------|
| Government                           |                                             | SEMA - Secretaria de Estado do Meio Ambiente de Boca do Acre (1)                                   | Ministerio del Ambiente (4)                                                          | DIRCETURA - Dirección Regional de Turismo y Artesanía (1)               |
|                                      |                                             | IDAM - Instituto de Desenvolvimento Agropecuário e Florestal Sustentável do Estado do Amazonas (1) | Ministerio de Transporte (2)                                                         | GOREL (2)                                                               |
|                                      |                                             |                                                                                                    | Instituto Sinchi (1)                                                                 | Gerencia de Planificación y Presupuesto (1)                             |
|                                      |                                             |                                                                                                    | Fondo Acción                                                                         | SERNANP - Servicio Nacional de Áreas Naturales Protegidas (2)           |
|                                      |                                             |                                                                                                    | Gobernación del Guaviare (1)                                                         | GERFOR - Gerencia de Desarrollo Forestal de Flora y Fauna Silvestre (2) |
|                                      |                                             |                                                                                                    | CorpoAmazonia - Corporación para el Desarrollo Sostenible del Sur de la Amazonía (1) | DECDB - Dirección Ejecutiva de Conservación y Diversidad Biológica (1)  |
|                                      |                                             |                                                                                                    | CDA - Corporación para el Desarrollo Sostenible del Norte y el Oriente Amazónico (2) | GRAI - Gerencia mosaical de Asuntos Indígenas (1)                       |
|                                      |                                             | STTR - Sindicato dos Trabalhadores e Trabalhadoras Rurais de Lábrea (1)                            | Resguardo Indígena de Yunguillo (1)                                                  | Coordinadora Regional de Pueblos Indígenas de San Lorenzo, CORPI SL (1) |
|                                      |                                             | ASAEX - Associação dos Seringueiros Agroextrativistas da                                           | Representante Pueblo Inga (1)                                                        | Comité de Gestión del Área de Conservación mosaical Alto Nanay          |
|                                      |                                             |                                                                                                    |                                                                                      |                                                                         |
| Indigenous/Community representatives | Comité de Protección Cachuela Esperanza (1) |                                                                                                    |                                                                                      |                                                                         |
|                                      | Pescador de comunidade de Porto Velho (2)   |                                                                                                    |                                                                                      |                                                                         |

|     | Reserva do Rio Ouro Preto (1)                                                  | Veeduría Carretera Mocoa (1)                                                    | Pintuyacu Chambira (2)                                       |
|-----|--------------------------------------------------------------------------------|---------------------------------------------------------------------------------|--------------------------------------------------------------|
|     | OCMA - Organización Comunal Mujer Amazónica (4)                                | OCMA - Organización Comunal de la Mujer Amazónica                               | Consejo Comunal de la Reserva Nacional Pucacuro (1)          |
|     | OPIPAM - Organização do Povo Indígena Parintintin do Amazonas (1)              | APIJ - Associação do Povo Indígena Jiahui (1)                                   |                                                              |
|     |                                                                                | OPIPAM - Organização do Povo Indígena Parintintin do Amazonas (1)               |                                                              |
|     |                                                                                | KANINDÉ - Associação de Defesa Etnoambiental Kanindé (1)                        |                                                              |
| NGO | WCS - Wildlife Conservation Society (1)                                        | ACT - Amazon Conservation Team (1)                                              | TNC - The Nature Conservancy (2)                             |
|     | FCDS - Fundación para la Conservación y Desarrollo Sostenible (1)              | IDESAM - Instituto de Conservação e Desenvolvimento Sustentável da Amazônia (1) | WCS - Wildlife Conservation Society (3)                      |
|     | IMV - Instituto Madeira Vivo (1)                                               | IPÊ - Instituto de Pesquisas Ecológicas (2)                                     | DAR - Derecho, Ambiente y Recursos Naturales (2)             |
|     | CEDLA - Centro de Estudios para el Desarrollo Laboral y Agrario (1)            | FCDS - Fundación para la Conservación y el Desarrollo Sostenible (5)            | CSF - Conservation Strategy Fund (1)                         |
|     | IEB - Instituto Internacional de Educação do Brasil (1)                        | WWF- World Wildlife Fund (3)                                                    | SPDA - Sociedad Peruana de Derecho Ambiental (3)             |
|     | FAUNAGUA - Instituto de Investigaciones Aplicadas de los Recursos del Agua (1) | ACT - Amazon Conservation Team (2)                                              | CEDIA - Centro para el Desarrollo del Indígena Amazónico (1) |
|     |                                                                                | Fondo Acción (1)                                                                | TNC - The Nature Conservancy (1)                             |
|     |                                                                                |                                                                                 | NCI - Naturaleza y Cultura Internacional (1)                 |
|     |                                                                                |                                                                                 | Field Museum of Chicago (1)                                  |
|     |                                                                                |                                                                                 | WWF - World Wildlife Fund                                    |

|                 |                                                                                   |                                                       |                             |                                                                     |
|-----------------|-----------------------------------------------------------------------------------|-------------------------------------------------------|-----------------------------|---------------------------------------------------------------------|
| <b>Academia</b> | UNIR - Universidade Federal de Rondônia (3)                                       | UNIR - Universidade Federal de Rondônia (6)           | Universidad del Rosario (1) | (Brazil) (1)<br>PUCP - Pontificia Universidad Católica del Perú (1) |
|                 | USP - Universidade Federal de São Paulo (1)                                       | UEA - Universidade Estadual do Amazonas (Humaitá) (1) |                             | UTEC - Universidad de Ingeniería y Tecnología (2)                   |
|                 | UAB-JB - CIRA - Universidad Autónoma del Beni José Ballivian (2)                  | UFAM - Universidade Federal do Amazonas (1)           |                             |                                                                     |
|                 | UAP - Universidad Amazónica de Pando, Área de Ciencias Biológicas y Naturales (7) |                                                       |                             |                                                                     |
|                 | IHH - UMSA - Instituto de Hidráulica e Hidrología (1)                             |                                                       |                             |                                                                     |

**Table S2.** Categories for the Areas of Value and Concern.

| Categories                | Description                                                                                                            |
|---------------------------|------------------------------------------------------------------------------------------------------------------------|
| Indigenous Territories    | all kinds of indigenous territories                                                                                    |
| Protected Areas           | national, federal, municipal and private protected areas (parks/reserves) for conservation and sustainable development |
| Roads                     | road influence and expansion                                                                                           |
| Dams                      | hydroelectric dams                                                                                                     |
| Hydroways                 | hydroways                                                                                                              |
| Mineral Extractivism      | mining and oil extraction areas                                                                                        |
| Larger landscapes         | corridors, frontier areas, and other large areas that are not defined by administrative boundaries                     |
| Administrative boundaries | specific cities, provinces, districts or settlement areas                                                              |
| Rivers and Watersheds     | specific river names or river basins                                                                                   |

**Table S3.** Categories and subcategories of participants' "explanations" of why the areas selected are of value and concern.

| Why   | Categories  | Subcategories       | Description                                                                                    |
|-------|-------------|---------------------|------------------------------------------------------------------------------------------------|
| Value | Environment | Forest              | Environmental, forest carbon, conservation, wildlife, territory, landscapes, forest production |
| Value | Environment | Hydrological        | Springs, water-resources, waterbodies, wetlands, oxbow-lakes, hydric richness                  |
| Value | Environment | Biodiversity        | or biological                                                                                  |
| Value | Social      | Human capacities    | Research, monitoring, management, institutional capacity and strengthening                     |
| Value | Social      | Community Forest    | Forest livelihoods, timber and non-timber forest products, agroforestry                        |
| Value | Social      | Cultural, Spiritual | cultural, spiritual, sacred, indigenous,                                                       |
| Value | Social      | Socioeconomic       | both, or economic or social                                                                    |
| Value | Social      | Fisheries           | for livelihoods                                                                                |
| Value | Social      | Touristic           | touristic                                                                                      |

|         |                     |                             |                                                                                                                         |
|---------|---------------------|-----------------------------|-------------------------------------------------------------------------------------------------------------------------|
| Value   | Social              | Other                       | Agriculture, logging, mining, hydroelectric, road                                                                       |
| Concern | Resource extraction | Aquaculture                 | fish and crustaceans farming impacts                                                                                    |
| Concern | Resource extraction | Agriculture                 | extensive agricultural expansion, and cattle ranching impacts                                                           |
| Concern | Resource extraction | Illegal Logging             | logging and illegal logging impacts                                                                                     |
| Concern | Resource extraction | Mining                      | Mining impacts                                                                                                          |
| Concern | Resource extraction | Oil-gas                     | oil-gas impacts                                                                                                         |
| Concern | Infrastructure      | Dams                        | dams, hydroelectric plants' impacts                                                                                     |
| Concern | Infrastructure      | Roads                       | road and highway expansion impacts                                                                                      |
| Concern | Infrastructure      | Hydroways                   | hydroways and hydrological value                                                                                        |
| Concern | Environmental       | Biodiversity-loss           | connectivity-loss, biodiversity loss and value, socio-biodiversity impacts, hunting and fauna killings through turnover |
| Concern | Environmental       | Deforestation               | Forest loss, deforestation and fragmentation                                                                            |
| Concern | Environmental       | Water                       | pollution, sedimentation, erosion, dredging, and river dynamics                                                         |
| Concern | Environmental       | Human capacities            | lack of environmental management, governance, research, support, institutional strengthening                            |
| Concern | Environmental       | Other environmental impacts | Protected area impacts, conservation, illegal activities, natural-resources extraction, waste, toxic materials          |
| Concern | Socio-economic      | Socio-cultural impacts      | socioeconomic, cultural impacts and values, indigenous livelihoods and territories, diseases, corruption                |
| Concern | Socio-economic      | Social conflicts            | social conflicts and violence                                                                                           |
| Concern | Socio-economic      | Land conflicts              | land-invasion, insecure tenure, conflicts                                                                               |
| Concern | Socio-economic      | Narcotrafficking and arms   | drug trade, coca, armed groups, and arm trade                                                                           |
| Concern | Socio-economic      | flooding                    | impacts from flooding                                                                                                   |
| Concern | Socio-economic      | fisheries                   | fishery stocks depletion, illegal fishing                                                                               |
| Concern | Socio-economic      | seismic                     | seismic impacts                                                                                                         |

**Table S4.** CMP Conservation Actions Classification v.2.0 (Conservation Measures Partnership, 2016).

| Classification Levels                             | Definition                                                                                                                               |
|---------------------------------------------------|------------------------------------------------------------------------------------------------------------------------------------------|
| CMP 1 - Land/Water Management                     | Actions directly managing or restoring sites, ecosystems and the wider environment                                                       |
| CMP 2 - Species Management                        | Actions directly managing or restoring specific species or taxonomic groups                                                              |
| CMP 3 - Awareness Raising                         | Actions making people aware of key issues and/or feeling desired emotions, leading to behavior change                                    |
| CMP 4 - Law Enforcement and Prosecution           | Actions monitoring and enforcing compliance with existing laws and policies at all levels to deter threats or compel conservation action |
| CMP 5 - Livelihood, Economic and Moral Incentives | Actions using livelihood, other economic and moral incentives to directly influence attitudes and behaviors                              |
| CMP 6 - Conservation Designation and Planning     | Actions directly protecting sites and/or species                                                                                         |
| CMP 7 - Legal and Policy Frameworks               | Actions developing and influencing legislation, policies and voluntary standards affecting conservation                                  |
| CMP 8 - Research and Monitoring                   | Actions collecting data and transforming it into information to support conservation work                                                |
| CMP 9 - Education and Training                    | Actions enhancing the knowledge and skills of specific individuals                                                                       |
| CMP 10 - Institutional Development                | Actions creating the institutions needed to support conservation work                                                                    |

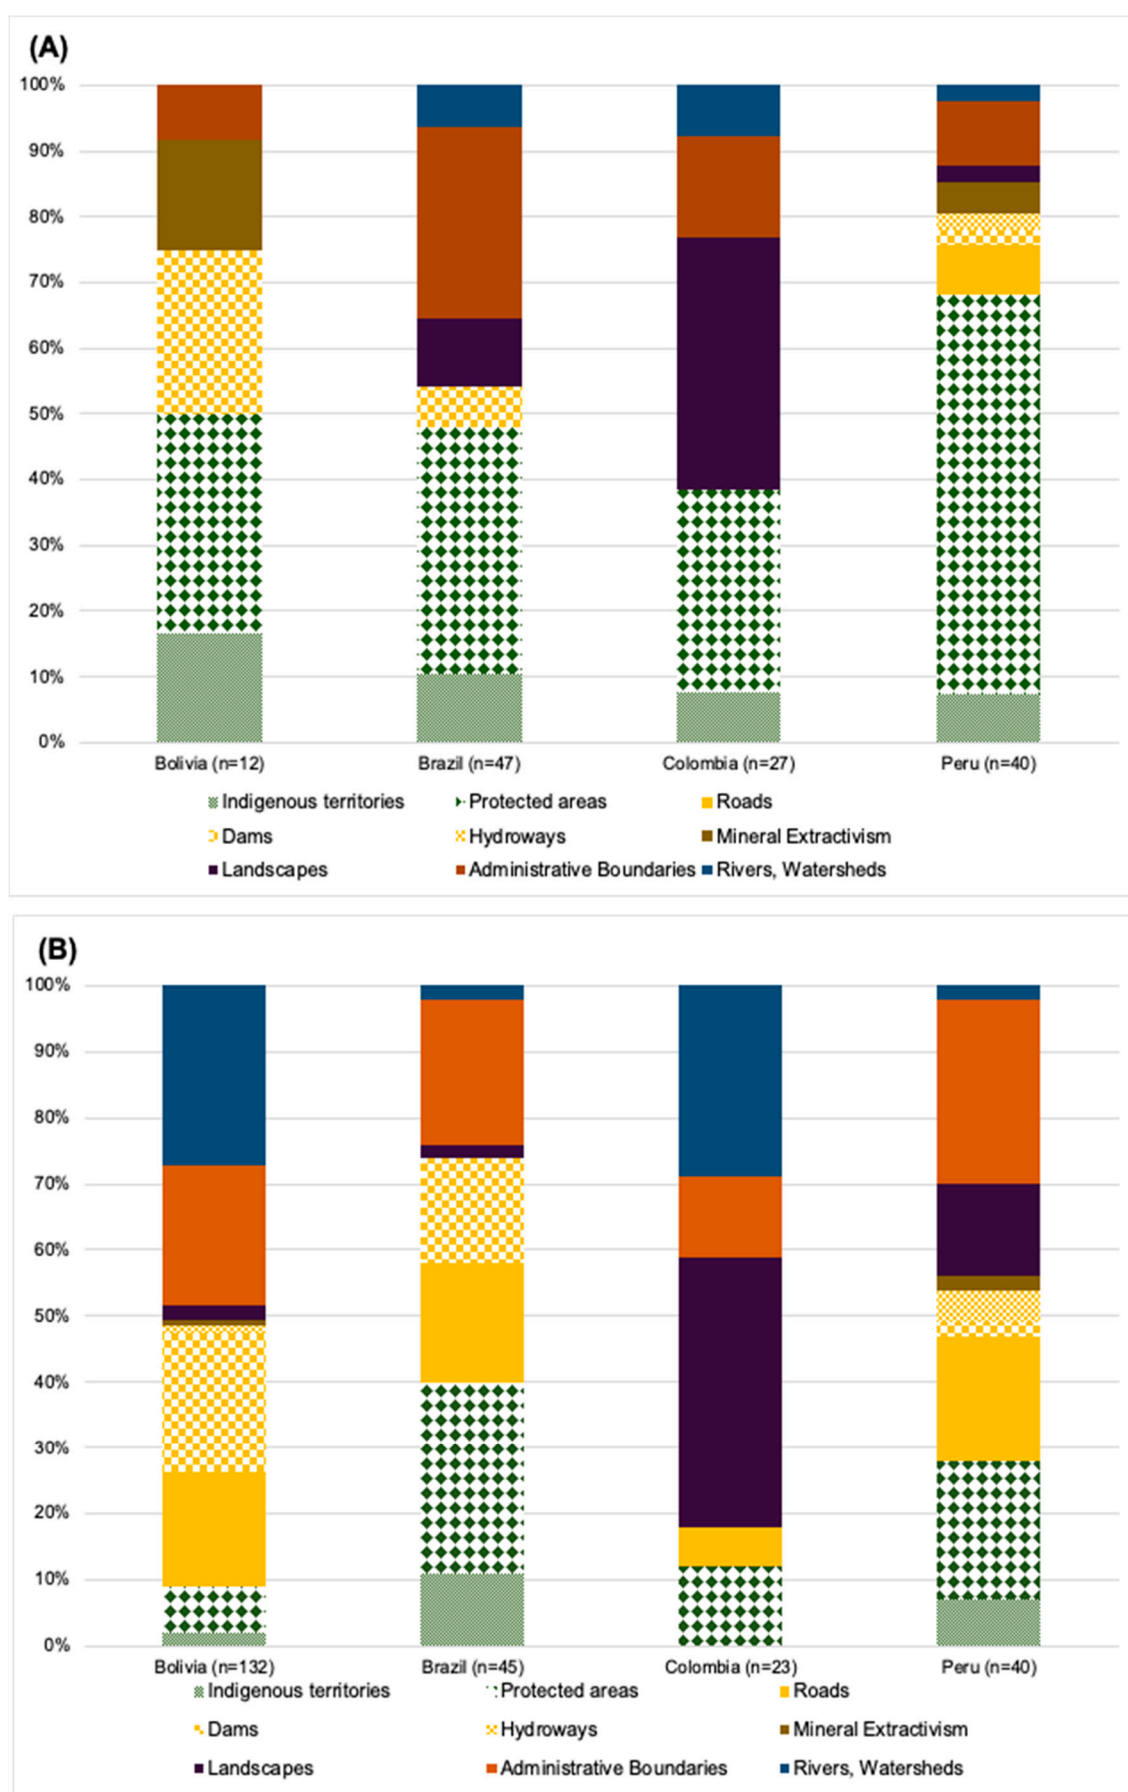

Figure S1. Percentages per category of areas of value (A) and concern (B) per mosaic.
